# Supplementary material for: Acidifiers Attenuate Diquat-Induced Oxidative Stress and Inflammatory Responses by Regulating NF-κB/MAPK/COX-2 Pathways in IPEC-J2 Cells
Source: MDPI journal article supplement (doi:10.3390/antiox11102002), 2022-10-10
Supplement: s1 [file s1]

**Table S1** Primer sequences used for real-time quantitative PCR.

| Gene name               | Accession number | Primer Sequence (5'-3')                                 |
|-------------------------|------------------|---------------------------------------------------------|
| Claudin-1               | NM_001244539.1   | AGATTTACTCCTACGCTGGT<br>GCACCTCATCATCTTCCAT             |
| Occludin                | NM_001163647.2   | ATGCTTTCTCAGCCAGCGTA<br>AAGGTTCCATAGCCTCTCGGTC          |
| ZO-1                    | NM_005659811.1   | GAGGATGGTCACCGTGGT<br>GGAGGATGCTGTTGTCTCGG              |
| TNF- $\alpha$           | NM_214022.1      | CCACGCTCTTCTGCCTACTGC<br>GCTGTCCCTCGGCTTTGAC            |
| IL-8                    | NM_213867        | TAGGACCAGAGCCAGGAAGA<br>AGCAGGAAAAC TGCCAAGAA           |
| IL-10                   | NM_214041.1      | ACCAGATGGGCGACTTGTG<br>TCTCTGCCTTCGGCATTACG             |
| BAX                     | XM_003127290.5   | CCGAAATGTTTGCTGACG<br>AGCCGATCTCGAAGGAAGT               |
| BCL-2                   | XM_001928880.6   | TTCTTTGAGTTCGGTGGGG<br>CCAGGAGAAATCAAATAGAGGC           |
| PCNA                    | NM_001291925.1   | AATGTTGATAAAGAGGAGGA<br>TAGGAGAGAGTGGAGTGGCT            |
| CCND1                   | XM_021082686.1   | CAGAAAGTCCGAGGAGGAGGT<br>CGGATGGAGTTGTCTCGGTGTA         |
| COX-2                   | NM_214321.1      | AGAAGCGAGGACCAGCTTTC<br>AAAGCGGAGGTGTTTCAGGAG           |
| NF- $\kappa$ B          | NM_001048232.1   | CTTACACTTGGCAATCATCC<br>ATAGCGTTCAGACCTTCAC             |
| I- $\kappa$ B- $\alpha$ | NM_010907.2      | TGCAGGCCACCAACTACAAT<br>TCAACAAGAGCGACACCAGG            |
| I- $\kappa$ B- $\beta$  | NM_001099935.1   | CTGCCTGTCCAAGATGAAGAACTCC<br>GTCCGATGTGATCCCAAAC TCTGTC |
| ERK1                    | XM_021088019.1   | CCGCTTGCCTCATTAAAGCC<br>TTAGACGTGGCAGCTTGGTT            |
| JNK2                    | XM_005661441.3   | AAACAAGTCAAGCCAGAG<br>AGCAGGGTCATACCAAAC                |
| GAPDH                   | NM_001206359.1   | CGGAGTGAACGGATTTGGC<br>CACCCCATTTGATGTTGGCG             |
